# Supplementary material
Source: PubMed Central journal article supplement (PMC2940225)
Supplement: NIHMS218049-supplement-Supp_figures.pdf [file NIHMS218049-supplement-Supp_figures.pdf]

Supplementary Material for

**A synthetic coiled-coil interactome provides heterospecific modules for molecular engineering**

Aaron W. Reinke, Robert A. Grant and Amy E. Keating

MIT Department of Biology

77 Massachusetts Avenue

Cambridge, MA 02139

keating@mit.edu

A

SYNZIP peptides  
 SYNZIP1\* NLVAQLEN<sup>E</sup>VASLE<sup>N</sup>ENETL<sup>K</sup>KKNLHKKDL<sup>I</sup>AYLE<sup>K</sup>EIANLR<sup>K</sup>KIEE  
 SYNZIP2\* ARNAYLR<sup>K</sup>KIARL<sup>K</sup>KNLQ<sup>L</sup>ERDE<sup>Q</sup>NLEK<sup>I</sup>IANLR<sup>D</sup>EIARLE<sup>N</sup>VASHEQ  
 SYNZIP3\* NEVTTLE<sup>N</sup>DAAFI<sup>E</sup>ENENAYL<sup>E</sup>KEIARLR<sup>K</sup>EKAALRN<sup>R</sup>LAHKK  
 SYNZIP4\* QKVAEL<sup>K</sup>NRVAV<sup>K</sup>LN<sup>R</sup>NEQL<sup>K</sup>NRVEEL<sup>K</sup>NRNAYL<sup>K</sup>NLELATLE<sup>N</sup>VARLE<sup>N</sup>DVAE  
 SYNZIP5\* NTVKEL<sup>N</sup>YIQEL<sup>E</sup>ERNAEL<sup>K</sup>NLKEHL<sup>K</sup>FAKAE<sup>L</sup>EFELAAH<sup>K</sup>FE  
 SYNZIP6\* QKVAQL<sup>K</sup>NRVAY<sup>K</sup>KLKENAK<sup>L</sup>ENI<sup>V</sup>ARLE<sup>N</sup>DNANLE<sup>K</sup>DIANL<sup>E</sup>KDIANL<sup>E</sup>RDVAR  
 SYNZIP7\* KEI<sup>E</sup>YLE<sup>K</sup>EIERL<sup>K</sup>DLREHL<sup>K</sup>QD<sup>N</sup>AAHRQ<sup>E</sup>LNAL<sup>R</sup>LEEAK<sup>L</sup>EFILAHLL<sup>S</sup>T  
 SYNZIP8\* KEIANL<sup>E</sup>KEIASLE<sup>K</sup>KVAVL<sup>K</sup>QR<sup>N</sup>AAHKQ<sup>E</sup>VAAALR<sup>K</sup>EIAYVE<sup>D</sup>EIQYVE<sup>D</sup>E  
 SYNZIP9\* QKVESL<sup>K</sup>QKIEEL<sup>K</sup>QRKAQL<sup>K</sup>NDIANL<sup>E</sup>KEIAYA<sup>E</sup>T  
 SYNZIP10\* NLLATLR<sup>S</sup>TAAVLE<sup>N</sup>ENHVL<sup>E</sup>KEKE<sup>K</sup>LR<sup>K</sup>KEQL<sup>L</sup>NKLEAY<sup>K</sup>  
 SYNZIP11\* ELTDEL<sup>K</sup>NKKEAL<sup>R</sup>KNDAAL<sup>L</sup>NELASLE<sup>N</sup>EIANLE<sup>K</sup>EIAY<sup>F</sup>K  
 SYNZIP12\* NEDLVL<sup>E</sup>NR<sup>L</sup>AALRN<sup>E</sup>NAAL<sup>E</sup>NDLARL<sup>E</sup>KEIAYLE<sup>K</sup>EIER<sup>E</sup>K  
 SYNZIP13\* QKVEEL<sup>K</sup>NKIAEL<sup>E</sup>NRNAV<sup>K</sup>KNRVAHL<sup>K</sup>QEIAYL<sup>K</sup>DELAH<sup>E</sup>FE  
 SYNZIP14\* NLDAYER<sup>E</sup>AEKLE<sup>K</sup>KN<sup>E</sup>NVLR<sup>N</sup>LAAL<sup>E</sup>NELATL<sup>R</sup>QEVAS<sup>M</sup>KQEL<sup>Q</sup>S  
 SYNZIP15\* FENVTH<sup>E</sup>FILATLE<sup>N</sup>ENAKL<sup>R</sup>LEAKL<sup>E</sup>RELARL<sup>R</sup>NEVAVL  
 SYNZIP16\* NILASLE<sup>N</sup>KK<sup>E</sup>EEL<sup>K</sup>KNLNAHL<sup>L</sup>KEIENLE<sup>K</sup>EIANLE<sup>K</sup>EIAY<sup>F</sup>K  
 SYNZIP17\* NEKEEL<sup>K</sup>SKKAEL<sup>R</sup>NR<sup>I</sup>EQL<sup>K</sup>QKREQL<sup>K</sup>QKIANL<sup>R</sup>KEIAY<sup>K</sup>  
 SYNZIP18\* STAATLE<sup>N</sup>DLARLE<sup>N</sup>ENARL<sup>E</sup>KDIANL<sup>E</sup>RD<sup>L</sup>AKL<sup>E</sup>RE<sup>E</sup>AY<sup>F</sup>  
 SYNZIP19\* NLESLE<sup>N</sup>KK<sup>E</sup>EEL<sup>K</sup>NRNEEL<sup>K</sup>QKREQL<sup>K</sup>QKLAALRN<sup>K</sup>LDAY<sup>K</sup>NR<sup>L</sup>  
 SYNZIP20\* STVEEL<sup>L</sup>RAIQE<sup>L</sup>EK<sup>R</sup>NAEL<sup>K</sup>NRKEEL<sup>K</sup>NLVAHL<sup>R</sup>QELAAH<sup>K</sup>YE  
 SYNZIP21\* NEVAQLE<sup>N</sup>DVAI<sup>E</sup>ENENAYL<sup>E</sup>KEIARLR<sup>K</sup>EIAALRD<sup>R</sup>LAHKK  
 SYNZIP22\* KR<sup>I</sup>AYLR<sup>K</sup>KIAAL<sup>K</sup>KNANL<sup>E</sup>KDIANL<sup>E</sup>NEIERL<sup>I</sup>KEIKTL<sup>E</sup>NEVASHEQ  
 SYNZIP23\* ALRAEL<sup>K</sup>KAKIALL<sup>R</sup>ADN<sup>W</sup>AL<sup>K</sup>RKAKDL<sup>R</sup>RL<sup>L</sup>RRLRN<sup>K</sup>AAEEL<sup>K</sup>  
 SYNZIP24\* QK<sup>L</sup>QTL<sup>R</sup>DL<sup>L</sup>AVLE<sup>N</sup>NRN<sup>Q</sup>EL<sup>K</sup>Q<sup>L</sup>RQHL<sup>K</sup>DL<sup>L</sup>KYLE<sup>D</sup>E<sup>L</sup>ATLE<sup>K</sup>E  
 SYNZIP25\* NETEQL<sup>I</sup>NKKEQL<sup>K</sup>NDNAAL<sup>E</sup>KDAASLE<sup>K</sup>EIANLE<sup>K</sup>EIAY<sup>F</sup>K  
 SYNZIP26\* EKIQEL<sup>K</sup>RR<sup>L</sup>AYFRRENATL<sup>K</sup>NDNATLE<sup>N</sup>ELASVEAENEAL<sup>R</sup>K  
 SYNZIP27\* KIQYL<sup>K</sup>QR<sup>I</sup>AELR<sup>K</sup>KIANLR<sup>K</sup>DIANLE<sup>D</sup>DAAVK<sup>E</sup>DEL<sup>V</sup>HL  
 SYNZIP28\* KEI<sup>E</sup>YLD<sup>R</sup>IAEL<sup>R</sup>SKIAAL<sup>R</sup>NDL<sup>T</sup>HL<sup>K</sup>NDK<sup>A</sup>HKEN<sup>E</sup>LAHL<sup>A</sup>  
 SYNZIP29\* ND<sup>I</sup>ENL<sup>K</sup>DKIEEL<sup>K</sup>QK<sup>E</sup>EL<sup>K</sup>QKIEYL<sup>K</sup>QKIEAL<sup>R</sup>QKLAAL<sup>K</sup>QR<sup>I</sup>A  
 SYNZIP30\* EKIEEL<sup>K</sup>DKIAEL<sup>R</sup>SR<sup>N</sup>AALRN<sup>K</sup>IEAL<sup>K</sup>QKLEAL<sup>R</sup>QKIEYL<sup>K</sup>DR<sup>I</sup>A  
 SYNZIP31\* AENQY<sup>E</sup>DEL<sup>I</sup>QYLE<sup>K</sup>ENARL<sup>K</sup>KEV<sup>Q</sup>RLV<sup>R</sup>EL<sup>S</sup>YFR<sup>R</sup>RI<sup>E</sup>ALA  
 SYNZIP32\* AENQSV<sup>E</sup>DI<sup>A</sup>KKEDEN<sup>A</sup>HL<sup>K</sup>NEV<sup>K</sup>TLIN<sup>E</sup>LET<sup>L</sup>R<sup>K</sup>KIEYL<sup>A</sup>  
 SYNZIP33\* RDLQNV<sup>E</sup>RI<sup>Q</sup>SLE<sup>K</sup>KN<sup>E</sup>SL<sup>K</sup>IASLE<sup>N</sup>ELATL<sup>K</sup>QEIAY<sup>F</sup>KRELAY  
 SYNZIP34\* DR<sup>L</sup>AVKEN<sup>R</sup>VAVL<sup>K</sup>KNENAKL<sup>R</sup>NIANL<sup>K</sup>DR<sup>I</sup>AYFRRELAY<sup>L</sup>LEEEQL<sup>A</sup>  
 SYNZIP35\* NKVEQL<sup>K</sup>NKVEQL<sup>K</sup>NR<sup>N</sup>AAL<sup>K</sup>NDLARL<sup>E</sup>REIAY<sup>A</sup>EE  
 SYNZIP36\* EKNQEL<sup>K</sup>NR<sup>L</sup>AVLE<sup>N</sup>DNAAL<sup>R</sup>NDLARL<sup>E</sup>REIAY<sup>M</sup>E  
 SYNZIP37\* KDIANL<sup>K</sup>KEIAHL<sup>K</sup>NDL<sup>Q</sup>RL<sup>E</sup>SIRERL<sup>K</sup>FDILN<sup>H</sup>EQE<sup>E</sup>YAL<sup>E</sup>  
 SYNZIP38\* NKNETL<sup>K</sup>NI<sup>N</sup>ARL<sup>R</sup>NDV<sup>A</sup>RL<sup>K</sup>NR<sup>I</sup>ARL<sup>K</sup>DDIEN<sup>V</sup>DEIQY<sup>L</sup>E  
 SYNZIP39\* LENAQIK<sup>K</sup>EIAQL<sup>R</sup>KEVAQL<sup>K</sup>QKIEEL<sup>K</sup>NDNAR<sup>V</sup>EREIQY<sup>L</sup>E  
 SYNZIP40\* QKRQQL<sup>K</sup>QKLAAL<sup>R</sup>RD<sup>I</sup>ENL<sup>Q</sup>DEIAY<sup>K</sup>E<sup>D</sup>EIANL<sup>K</sup>DKIEQL<sup>S</sup>  
 SYNZIP41\* QKIESL<sup>K</sup>DKLAN<sup>K</sup>RD<sup>K</sup>IALL<sup>R</sup>SEVASF<sup>E</sup>KEIAYLE<sup>K</sup>EIANL<sup>E</sup>N  
 SYNZIP42\* EKIEYL<sup>K</sup>DKLAH<sup>K</sup>NR<sup>E</sup>VAQL<sup>R</sup>KEV<sup>T</sup>HKV<sup>D</sup>EL<sup>T</sup>SL<sup>E</sup>NEVAQL<sup>L</sup>K  
 SYNZIP43\* QKVEQL<sup>K</sup>NKVEQL<sup>K</sup>KNESL<sup>E</sup>NKVAEL<sup>K</sup>NRNEY<sup>L</sup>KNKIENL<sup>I</sup>NDITN<sup>L</sup>ENDV<sup>A</sup>R  
 SYNZIP44\* QKVAQL<sup>K</sup>NI<sup>I</sup>AKKEDENAVL<sup>E</sup>NLVAVLE<sup>N</sup>ENAYL<sup>E</sup>KE<sup>L</sup>ARL<sup>E</sup>RD<sup>I</sup>ARAER<sup>D</sup>V<sup>K</sup>  
 SYNZIP45\* NR<sup>L</sup>QLE<sup>N</sup>KN<sup>E</sup>VL<sup>E</sup>KRKAEL<sup>R</sup>NEVATL<sup>E</sup>QELAAHRY<sup>E</sup>LAAIE<sup>K</sup>EIA  
 SYNZIP46\* KEIERL<sup>E</sup>KEIKTL<sup>I</sup>NL<sup>L</sup>TTL<sup>R</sup>QD<sup>N</sup>AAHRKEAAALE<sup>K</sup>EANL<sup>R</sup>EDIQNL<sup>L</sup>RY  
 SYNZIP47\* SKYDAL<sup>R</sup>NKLEAL<sup>K</sup>NR<sup>N</sup>AQL<sup>R</sup>KE<sup>N</sup>EQL<sup>R</sup>EEAVLE<sup>V</sup>RNEVL  
 SYNZIP48\* QK<sup>I</sup>AYLR<sup>D</sup>RI<sup>A</sup>AL<sup>K</sup>AENEAL<sup>R</sup>AKNEAL<sup>R</sup>SKIEEL<sup>K</sup>KEEEL<sup>R</sup>DKIAQ<sup>K</sup>KDR

Human peptides  
 BATF\* QKADTLH<sup>E</sup>SEDL<sup>E</sup>KQNAAL<sup>R</sup>KEIKQLTEELKY<sup>F</sup>TVSLNSHE  
 FOS\* ELTDTLQA<sup>E</sup>TDQL<sup>E</sup>DEK<sup>S</sup>ALQTEIANLLKE<sup>K</sup>EKLE<sup>F</sup>ILAAHR  
 ATF4\* AEQ<sup>E</sup>AL<sup>T</sup>GECKE<sup>L</sup>EK<sup>K</sup>NEAL<sup>K</sup>ERADSLAKEIQY<sup>L</sup>LDLIEEVR<sup>K</sup>ARGK<sup>R</sup>RV  
 ATF3 EKTECLQ<sup>E</sup>SEKLESV<sup>N</sup>AELKAQIEEL<sup>K</sup>KN<sup>E</sup>QHLY<sup>M</sup>LN<sup>L</sup>HR  
 BACH1 DCIQNLE<sup>S</sup>EIEK<sup>L</sup>QSEKES<sup>L</sup>LKERD<sup>H</sup>ILSTLGETK<sup>Q</sup>NLTGL  
 JUND ERISRL<sup>E</sup>EKV<sup>K</sup>TL<sup>K</sup>SQNT<sup>E</sup>LASTASLLRE<sup>Q</sup>V<sup>A</sup>QL<sup>K</sup>QV<sup>L</sup>SHV  
 NFE2L3 D<sup>I</sup>LNL<sup>E</sup>DV<sup>C</sup>NLQAK<sup>K</sup>ETL<sup>K</sup>REQAQCN<sup>K</sup>A<sup>I</sup>NIMK<sup>Q</sup>KLHDL  
 Heptad fgabcdefgabcdefgabcdefgabcdefgabcdefgabcdefgabc

B

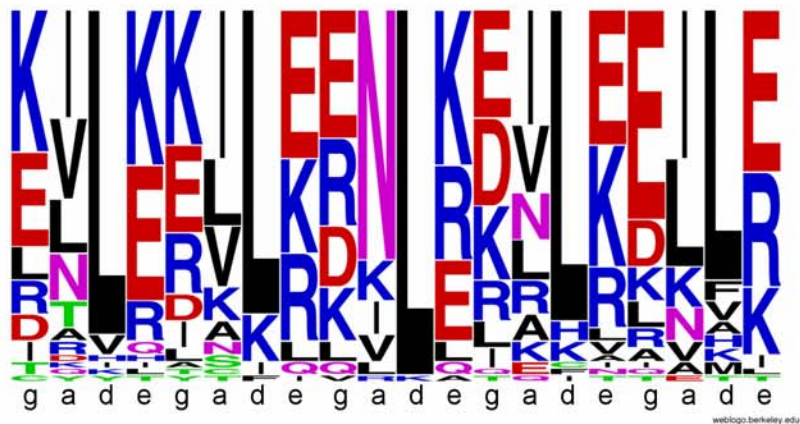

**Figure S1.** Sequences and sequence features of the 55 peptides measured. (A) Multiple-sequence alignment of the coiled-coil regions of the 55 peptides. Sequences start at an **f** position. Positions are colored as follows: **b**, **c**, and **f** positions (black), **g** (orange), **a** (blue), **d** (green), and **e** (purple). Peptides that form at least one hetero-specific interaction are indicated with an asterisk. (B) Sequence logo constructed using **a**, **d**, **e**, and **g** positions of the first 5 heptads of each peptide. See reference 1 for details. Sequence logo created with <http://weblogo.berkeley.edu/><sup>2</sup>.

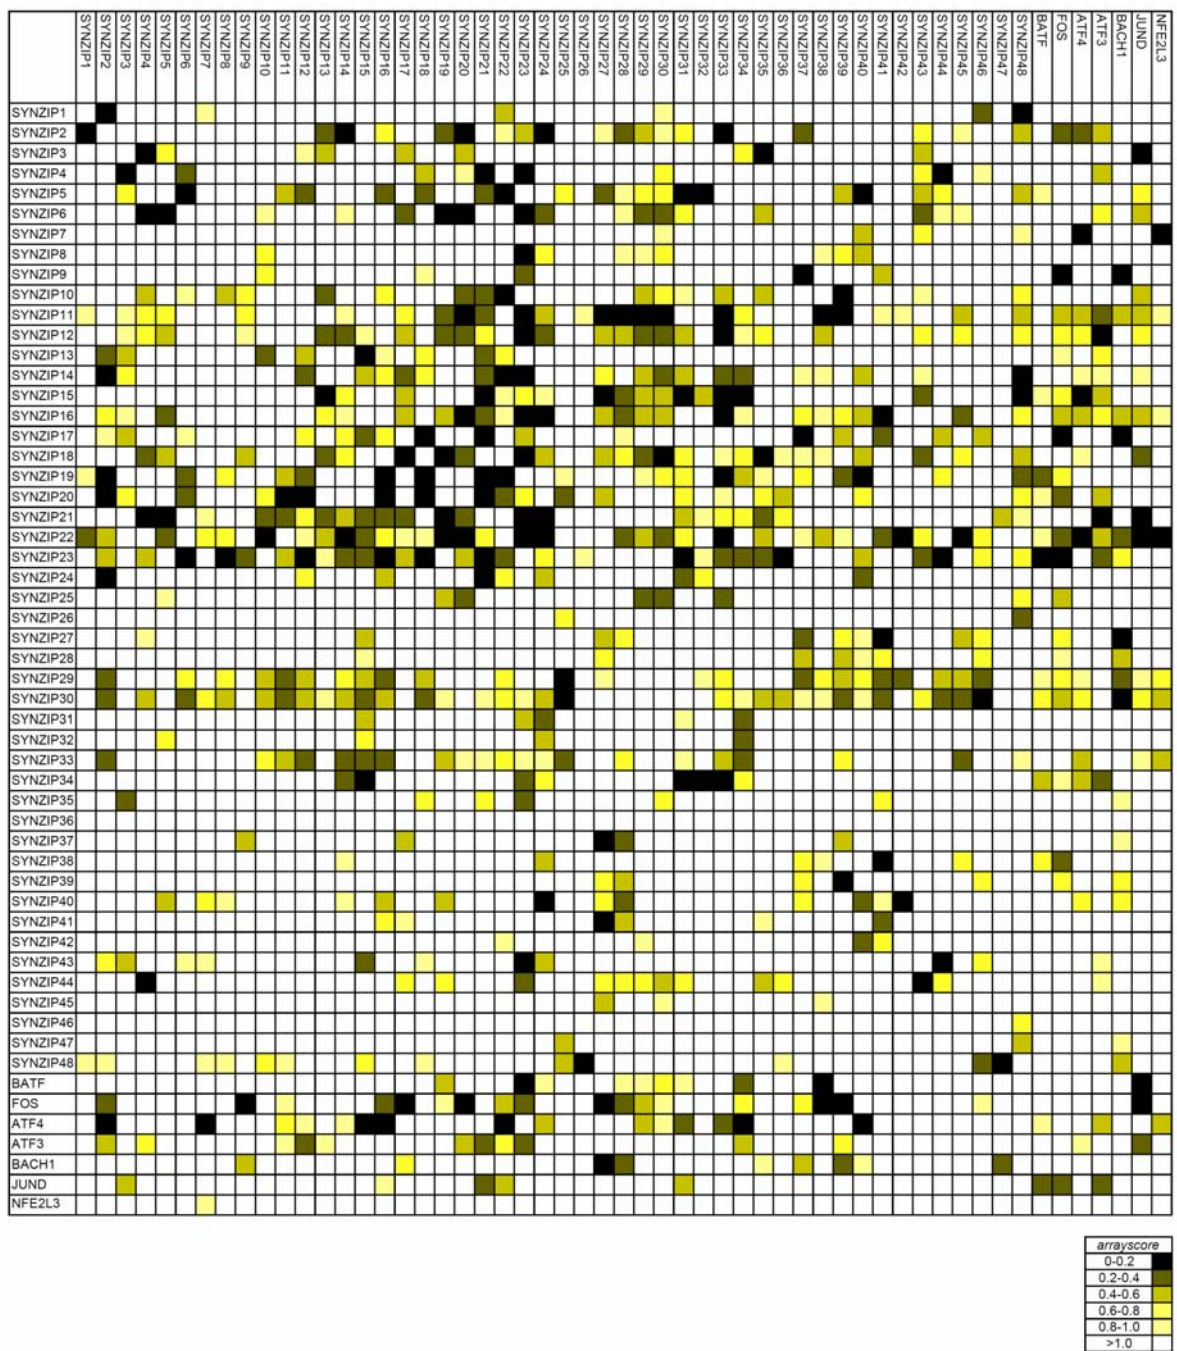

**Figure S2.** Array measurements for all 55 peptides. Peptides printed on the surface are listed in rows, and fluorescently labeled peptides in solution are listed in columns. Color indicates the strength of the array fluorescence signal, given as *arrayscore* values (see Methods) according to the color bar with 0 (black) indicating the strongest signal and >1 (white) indicating the weakest.

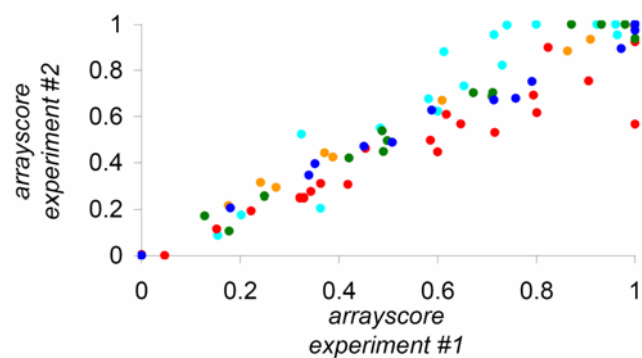

**Figure S3.** Reproducibility of the array experiments. Five solution probes measured in separate experiments are shown as a scatter plot. *Arrayscore* values  $>1$  are set to 1. Blue, SYNZIP5 ( $R^2=.99$ ). Orange, SYNZIP6 ( $R^2=.99$ ). Teal, SYNZIP37 ( $R^2=.91$ ). Red, FOS ( $R^2=.95$ ). Green, ATF4 ( $R^2=.99$ ).

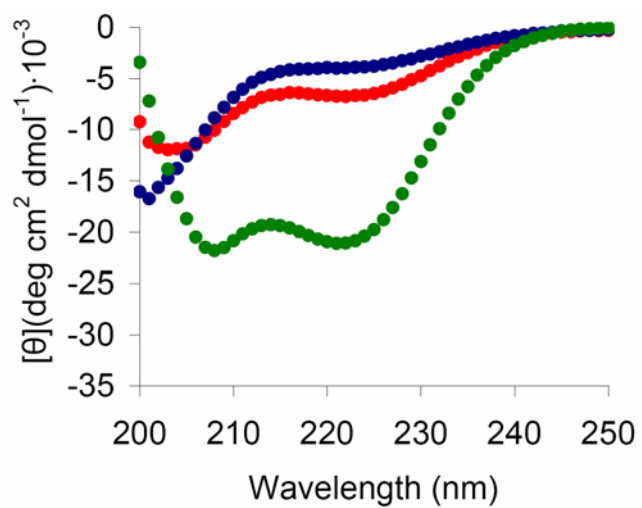

**Figure S4.** CD spectra for heterospecific pair SYNZIP6 + SYNZIP5. The mixture of SYNZIP5 with SYNZIP6 (4  $\mu$ M each peptide) is in green. SYNZIP6 alone (4  $\mu$ M) is in blue, SYNZIP5 alone (4  $\mu$ M) is in red.



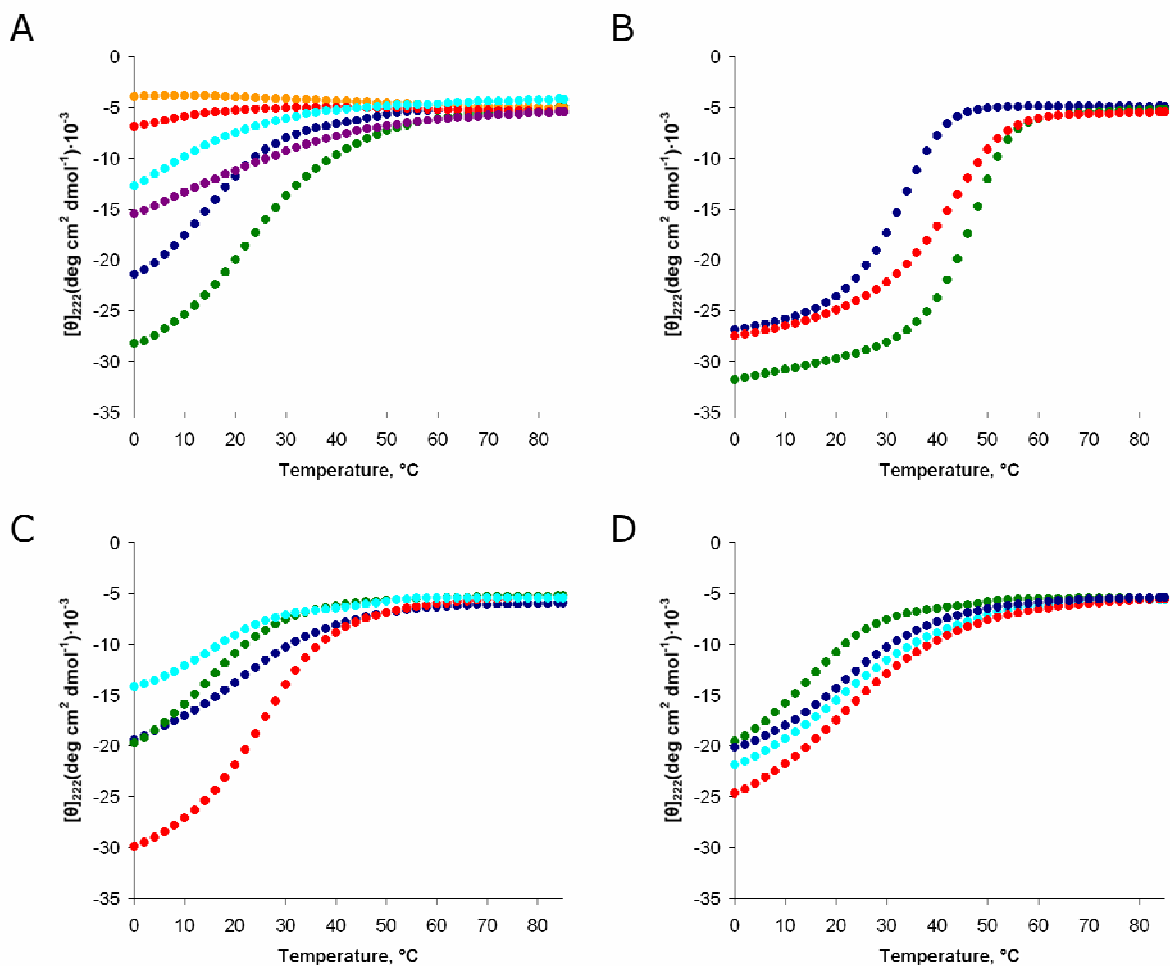

**Figure S5.** CD-monitored thermal melts of peptide pairs that form orthogonal sets. (A) Isolated peptides. ATF4-2 (green), SYNZIP1 (blue), SYNZIP3 (purple), SYNZIP5 (teal), SYNZIP4 (red), and SYNZIP6 (orange). (B) Interacting complexes: SYNZIP2 + SYNZIP1 (green), SYNZIP4 + SYNZIP3 (red), SYNZIP6 + SYNZIP5 (blue). (C) Non-interactions for orthogonal pair [SYNZIP2:SYNZIP1, SYNZIP6:SYNZIP5]: SYNZIP2 + SYNZIP5 (red), SYNZIP2 + SYNZIP6 (blue), SYNZIP1 + SYNZIP5 (green) + SYNZIP1 + SYNZIP6 (teal). (D) Non-interactions for orthogonal pair [SYNZIP2:SYNZIP1, SYNZIP4:SYNZIP3]: SYNZIP2 + SYNZIP3 (red), SYNZIP2 + SYNZIP4 (blue), SYNZIP1 + SYNZIP3 (teal) + SYNZIP1 + SYNZIP4 (green). Each individual peptide concentration was 4  $\mu\text{M}$ , or 4  $\mu\text{M}$  each (8  $\mu\text{M}$  total peptide concentration) for mixtures.

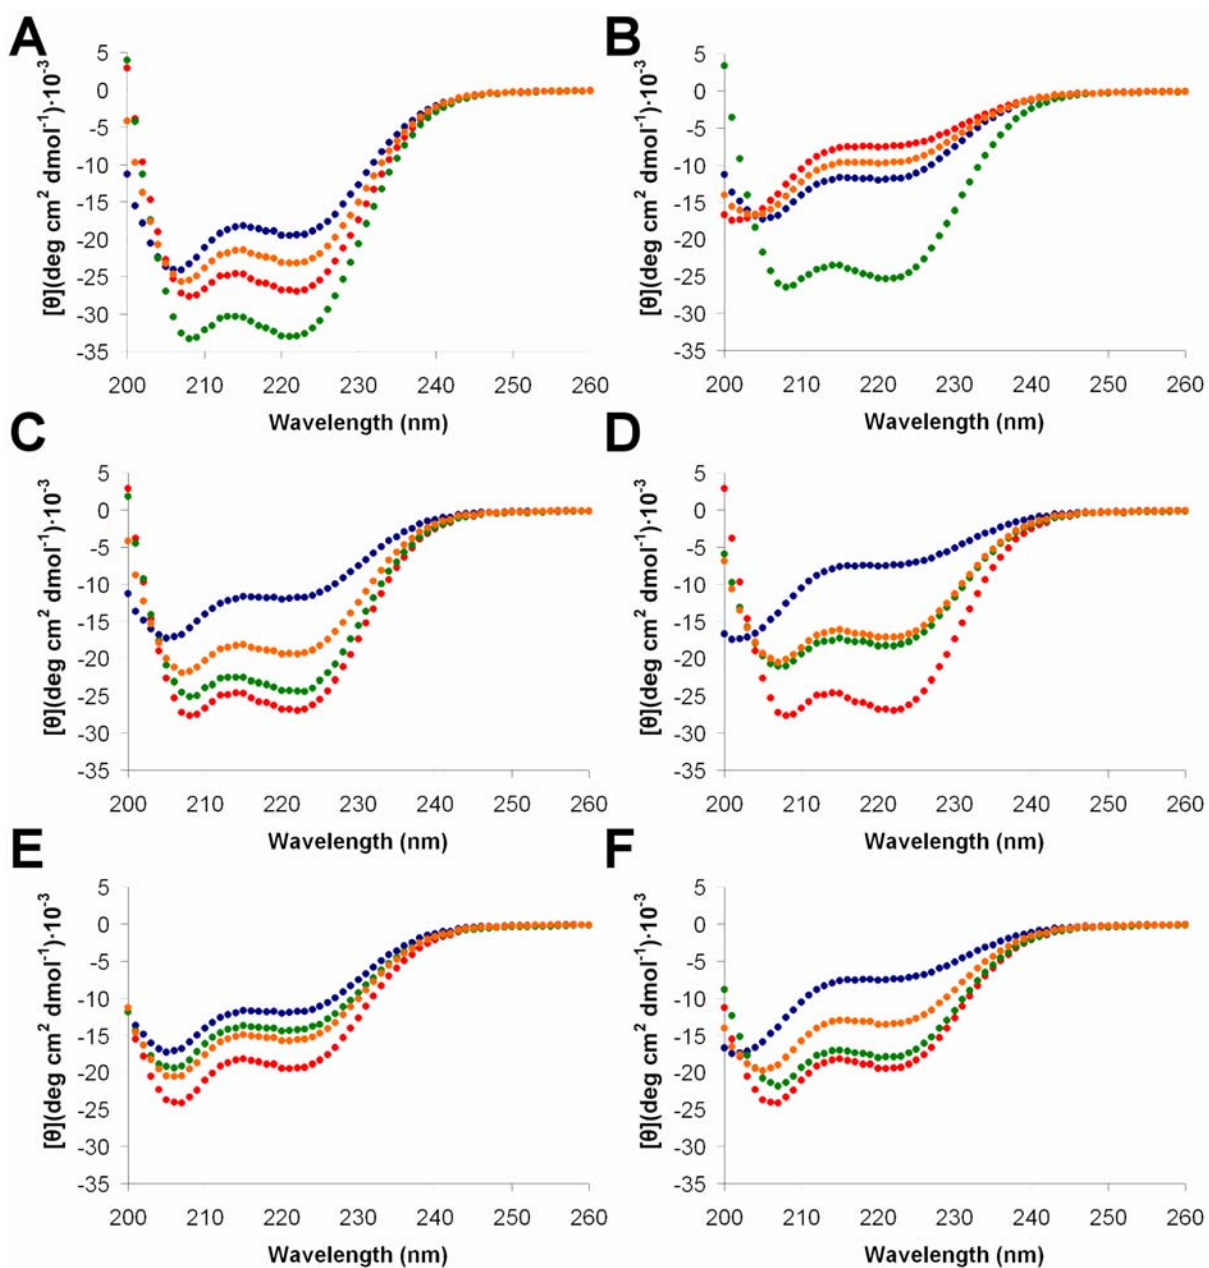

**Figure S6.** CD spectra characterizing an orthogonal set consisting of FOS:SYNZIP9 and SYNZIP3:SYNZIP4. (A, B) Characterization of ‘on’ interactions. (C-F) Characterization of ‘off’ interactions. (A) FOS (blue), SYNZIP9 (red), mixture of FOS + SYNZIP9 (green), and the mathematical average of the individual spectra (orange). (B) SYNZIP3 (blue), SYNZIP4 (red), mixture of SYNZIP3 + SYNZIP4 (green), and the average of the individual spectra (orange). (C) SYNZIP3 (blue), SYNZIP9 (red), mixture of SYNZIP3 + SYNZIP9 (green), and the average of the individual spectra (orange). (D) SYNZIP4 (blue), SYNZIP9 (red), mixture of SYNZIP4 + SYNZIP9 (green), and average of the individual spectra (orange). (E) SYNZIP3 (blue), FOS (red), mixture of SYNZIP3 + FOS (green), and average of the individual spectra (orange). (F) SYNZIP4 (blue), FOS (red), mixture of SYNZIP4 + FOS (green), and average of the individual spectra (orange). Spectra were measured at 25 °C at peptide concentrations of 40  $\mu$ M or 20  $\mu$ M of each peptide in mixtures (40  $\mu$ M total peptide concentration).



A

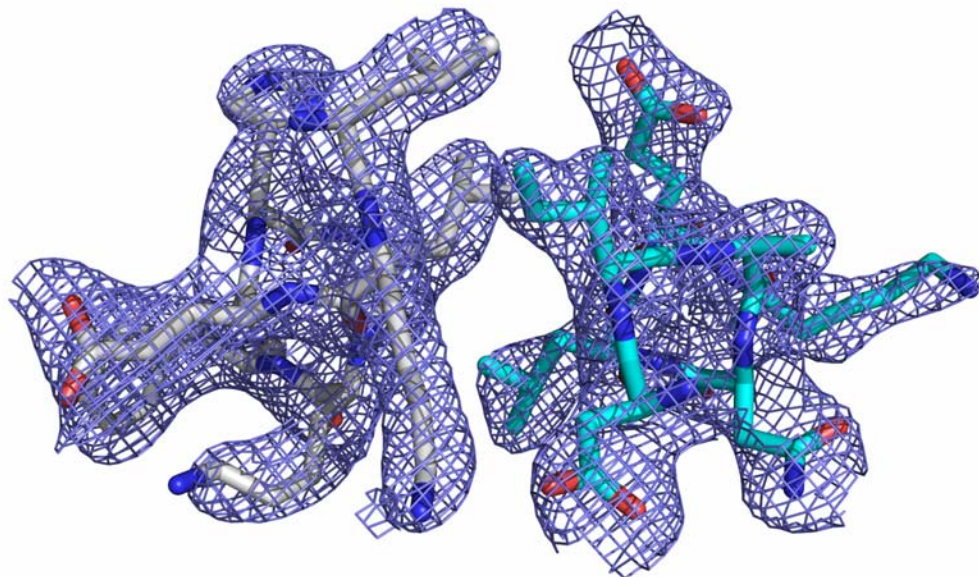

B

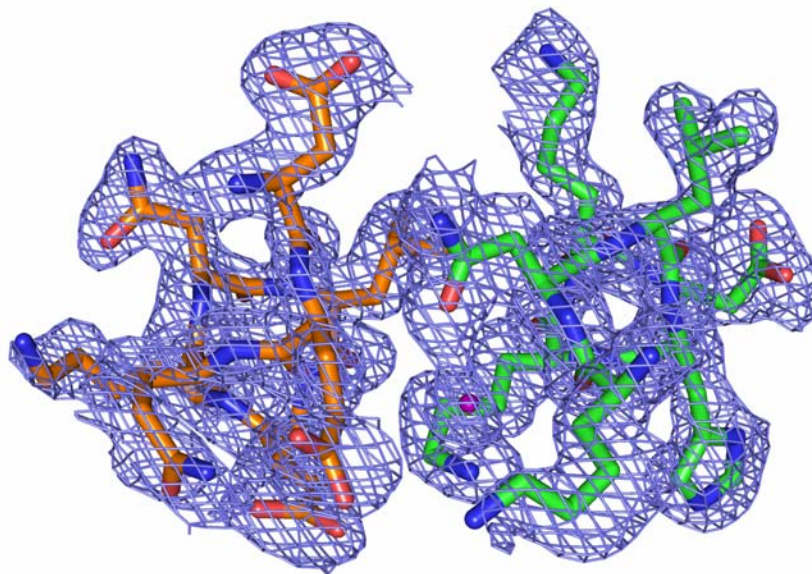

**Figure S7.** Electron density maps of SYNZIP5:SYNZIP6 and SYNZIP2:SYNZIP1. (A) The fourth heptad of SYNZIP5 (residues 23-29):SYNZIP6 (residues 37-43). (B) The fourth heptad of SYNZIP2 (residues 23-29):SYNZIP1 (residues 23-29). These correspond to the heptads shown in Figure 3 G and H.

**Table S1.** Protein and DNA sequences used in this study.

**Table S2.** Average background-corrected fluorescence values from the array experiment.

**Table S3.** List of the proteins composing each of the subnetworks identified.

**Table S4.** Crystallographic data collection and refinement statistics.

### **Supplementary References**

1. Grigoryan, G.; Reinke, A. W.; Keating, A. E. *Nature* **2009**, *458*, 859-864.
2. Crooks, G. E.; Hon, G.; Chandonia, J.-M.; Brenner, S. E. *Genome Research* **2004**, *14*, 1188-1190.
